# Supplementary material
Source: PubMed Central journal article supplement (PMC5893356)
Supplement: NIHMS944271-supplement-1.pdf [file NIHMS944271-supplement-1.pdf]

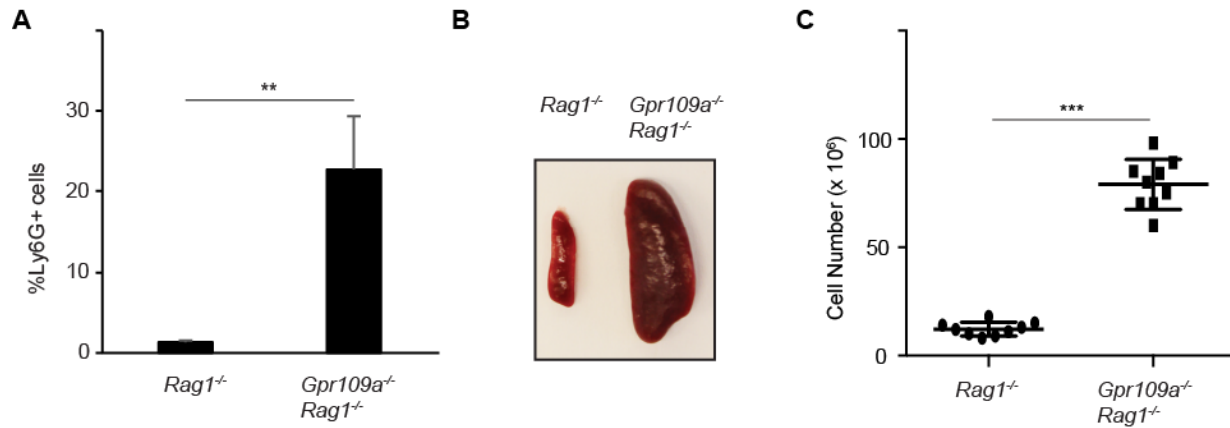

**Supplemental FIGURE 1.** Colitis in *Gpr109a*<sup>-/-</sup>*Rag1*<sup>-/-</sup> mice. (A) Frequency of Ly6G<sup>+</sup> cells among CD45<sup>+</sup> cells in colons of indicated mice. Error bars represent standard deviation of mean (n = 3 mice/genotype). (B) A representative photograph of spleens of *Rag1*<sup>-/-</sup> and *Gpr109a*<sup>-/-</sup>*Rag1*<sup>-/-</sup> mice. (C) Total number of nucleated cells in spleens of *Rag1*<sup>-/-</sup> and *Gpr109a*<sup>-/-</sup>*Rag1*<sup>-/-</sup> mice. Each circle and square represents an individual mouse. Lines represent the mean. n = 9 mice/genotype. \*\*\* P<0.0005. A representative or pooled data of at least two experiments is shown.

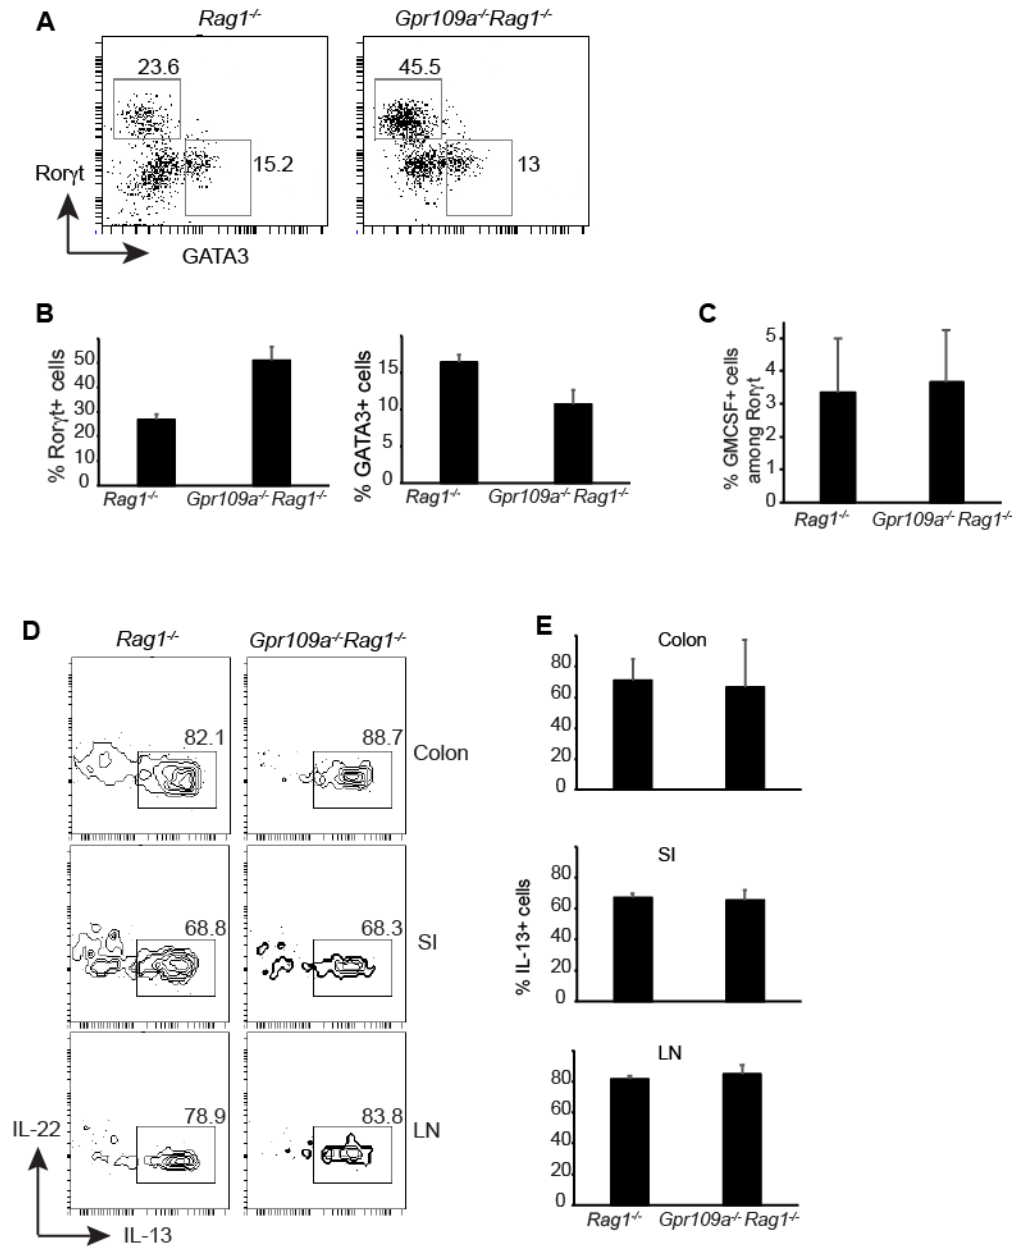

**Supplemental FIGURE 2.** Phenotype of ILC3 in *Rag1*<sup>-/-</sup> and *Gpr109a*<sup>-/-</sup>*Rag1*<sup>-/-</sup> mice. Frequency (A) and enumeration (B) of Rorγt<sup>+</sup> and GATA3<sup>+</sup> cells among CD45<sup>+</sup>Thy1.2<sup>+</sup> cells in small intestine of indicated mice (n = 5 mice/group). (C) Frequency of GM-CSF producing cells among CD45<sup>+</sup>Thy1.2<sup>+</sup> Rorγt<sup>+</sup> cells following stimulation with PMA and ionomycin (n = 3 mice/group). (D) IL-13 production by CD45<sup>+</sup>Thy1.2<sup>+</sup> GATA3<sup>+</sup> cells from indicated mice *in vitro* following stimulation with PMA and ionomycin. (E) Enumeration of IL-13<sup>+</sup> cells in D. Error bars represent standard deviation of mean. (n = 3 mice/group). A representative or pooled data of at least two experiments is shown.

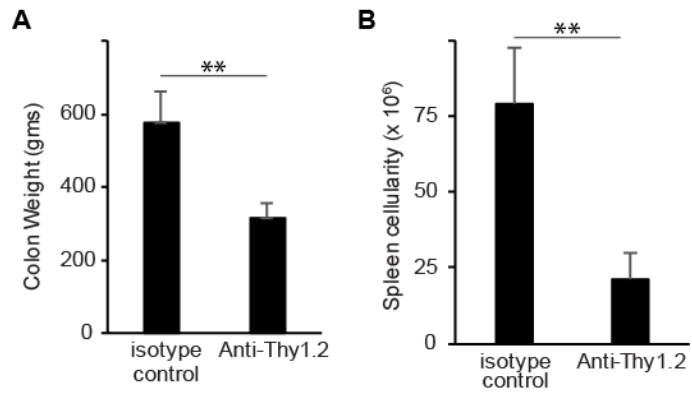

**Supplemental FIGURE 3.** Colon mass and total number of cells in spleens of *Gpr109a*<sup>-/-</sup>*Rag1*<sup>-/-</sup> mice treated with anti-Thy1.2 or isotype control antibody. Error bars represent standard deviation of mean (n = 7 mice/group). \*\* P<0.005. Pooled data of at least two experiments is shown.
